# Supplementary material for: 3D microvascular model recapitulates the diffuse large B-cell lymphoma tumor microenvironment in vitro
Source: Royal Society of Chemistry journal article supplement (doi:10.1039/c6lc01204c), 2016-12-24
Supplement: c6lc01204c3.pdf [file c6lc01204c3.pdf]

Supplemental Data:

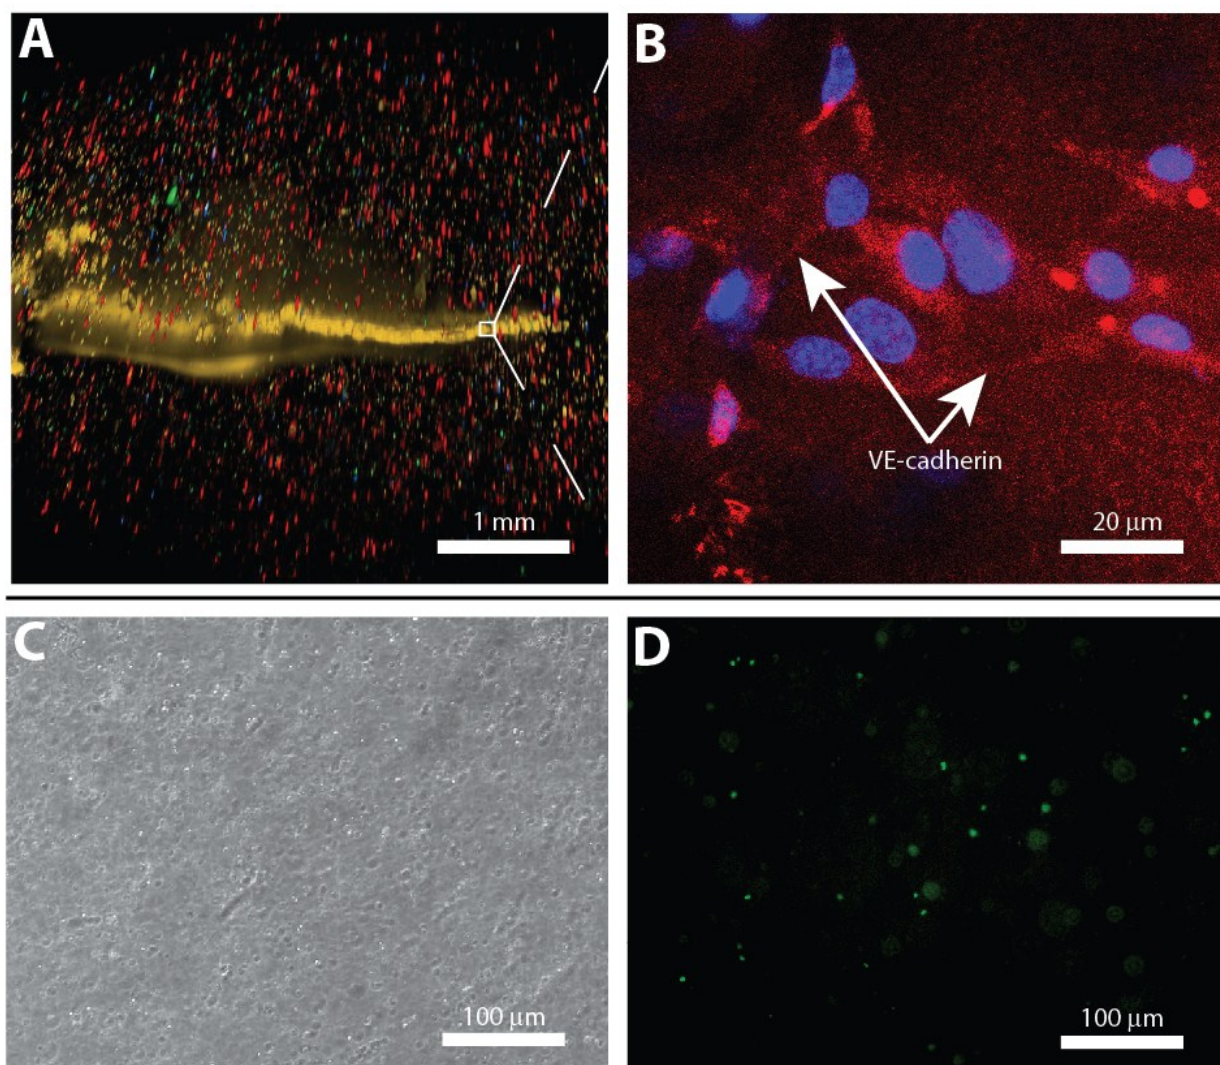

**Fig. S1: Endothelial and immune cells present in the DLBCL tumor microenvironment are viable and in close proximity to each other in the lymphoma-on-chip model.** **A)** Confocal micrograph showing various immune cells and endothelial cells in close proximity to one another in the DLBCL-on-chip model. **B)** Endothelial cells express minimal VE-cadherin at the cell-cell junctions, indicating presence of a permeable endothelial monolayer within the microchannel. **C-D)** Bright field and epifluorescence micrographs showing total and live tumor cells within the lymphoma-on chip model. This data was used to calculate a tumor cell viability of ~70%.

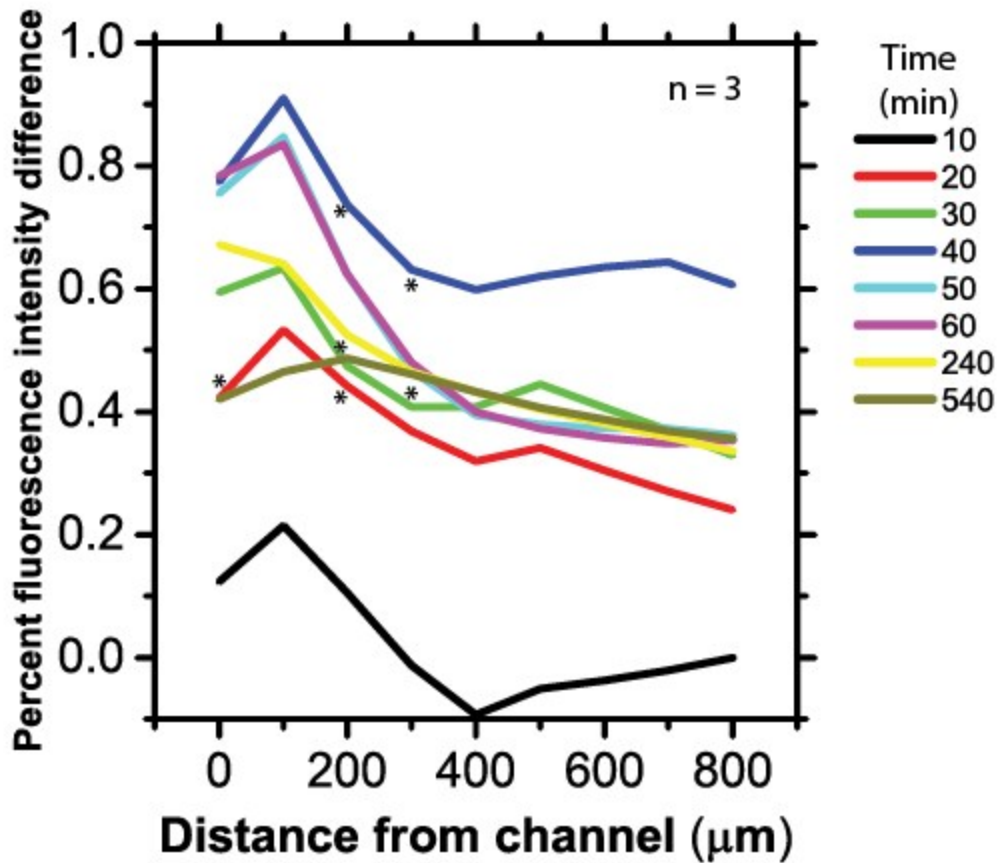

**Fig. S2: Presence of tumor cells in the DLBCL-on-a-chip model leads to an increase in the permeability of the endothelial channel.** The percentage fluorescence intensity difference shows the percent change of fluorescence intensity when tumor cells are added to the DLBCL-on-a-chip model. Positive values indicate an increase in endothelial permeability when tumor cells are present. Fluorescence intensity was used to measure endothelial channel permeability, and is a measurement of infused fluorescent antibody that had diffused into the hydrogel. Fluorescence intensity was measured at increasing time points and distances from the endothelial channel. Asterisks indicate values that show a statistically significant increase in endothelial permeability when tumor cells are present. Statistical significance was determined via t-test ( $p < 0.05$ ).  $n = 3$ .
